# Supplementary material for: A scalable ball milling strategy to endow SnS anode electrodes with free volume property for enhanced electrochemical performance
Source: Royal Society of Chemistry journal article supplement (doi:10.1039/d2nj01221a), 2022-01-01
Supplement: d2nj01221a1.pdf [file d2nj01221a1.pdf]

## Supporting Information for

### A scalable ball milling strategy to endow SnS anode electrode with free volume property for enhanced electrochemical performance

Huibin Guan<sup>a</sup>, Dong Feng<sup>\*b</sup>, Qi Liu<sup>b</sup>, Tianbiao Zeng<sup>\*a</sup>

a. State Key Laboratory of Polymer Materials Engineering, Polymer Research Institute of Sichuan University, Chengdu 610065, China

b. Yunnan Provincial Key Laboratory of Energy Saving in Phosphorus Chemical Engineering and New Phosphorus Materials, Faculty of Chemical Engineering, Kunming University of Science and Technology, Kunming 650500, China

\*: Corresponding authors (D Feng, [fdryan@kust.edu.cn](mailto:fdryan@kust.edu.cn); T Zeng, [tianbiaoZeng@126.com](mailto:tianbiaoZeng@126.com))

**Table S1** Tap density and real density of pure SnS, SnS/G-5%, SnS/G-15%, SnS/G-25%, and milled graphite. (The real density was measured by drainage method, and liquid was absolute alcohol)

| Density      | SnS   | SnS-5% | SnS-15% | SnS-25% | Graphene |
|--------------|-------|--------|---------|---------|----------|
| Tap density  | 2.571 | 2.117  | 1.601   | 1.763   | 1.406    |
| Real density | 5.457 | 4.481  | 4.318   | 4.368   | 1.92     |

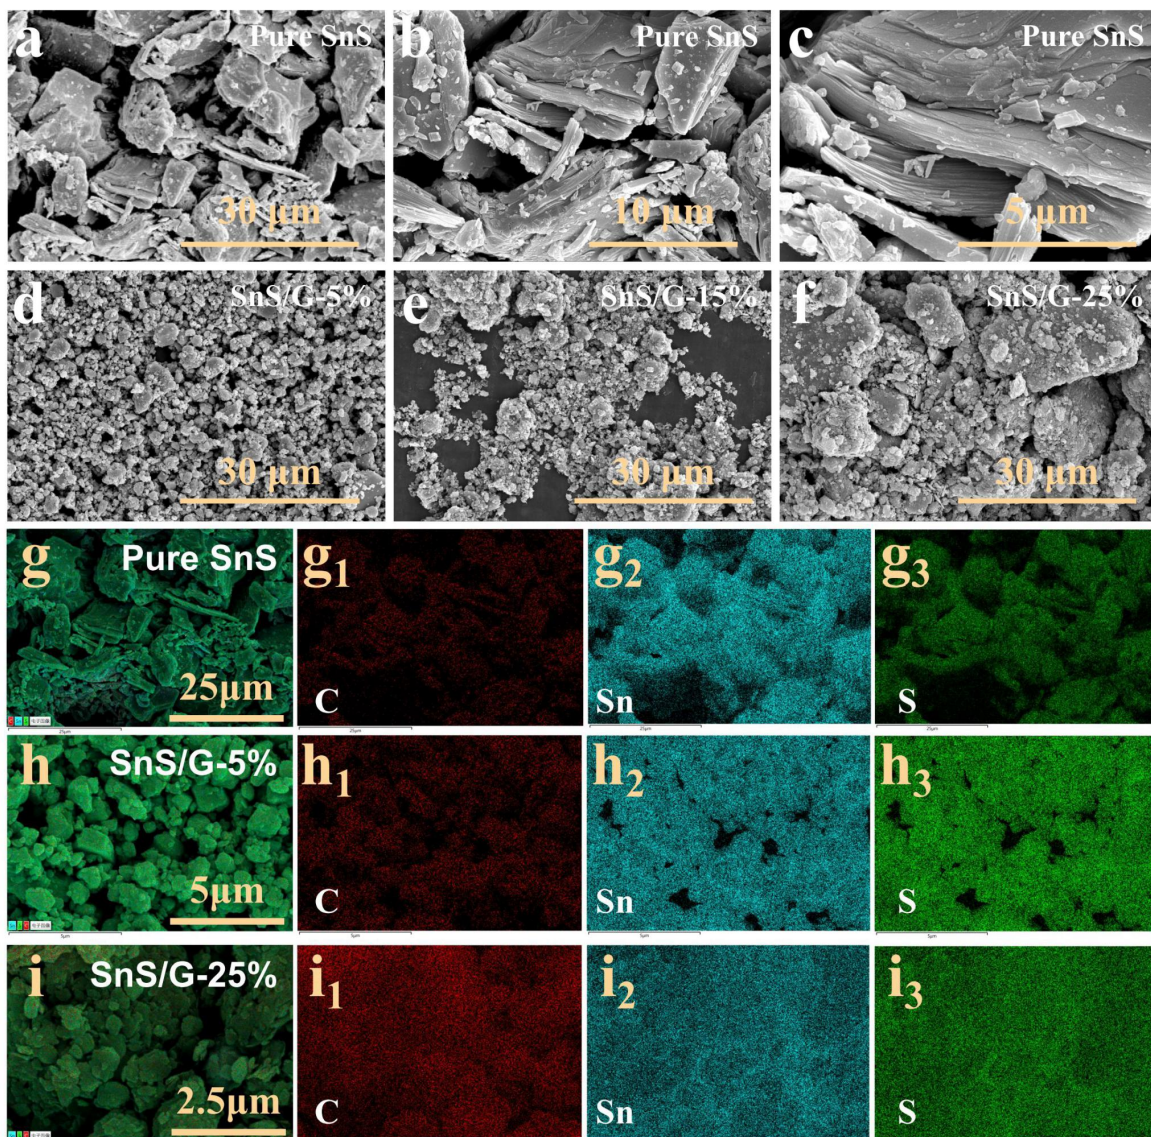

**Fig. S1** (a, b, c) SEM images of pure SnS, (d) SnS/G-5%, (e) SnS/G-15%, (f) SnS/G-25%; Mapping images of C, Sn, S distribution of (g~g<sub>3</sub>) pure SnS, (h~h<sub>3</sub>) SnS/G-5%, (i~i<sub>3</sub>) SnS/G-25%.

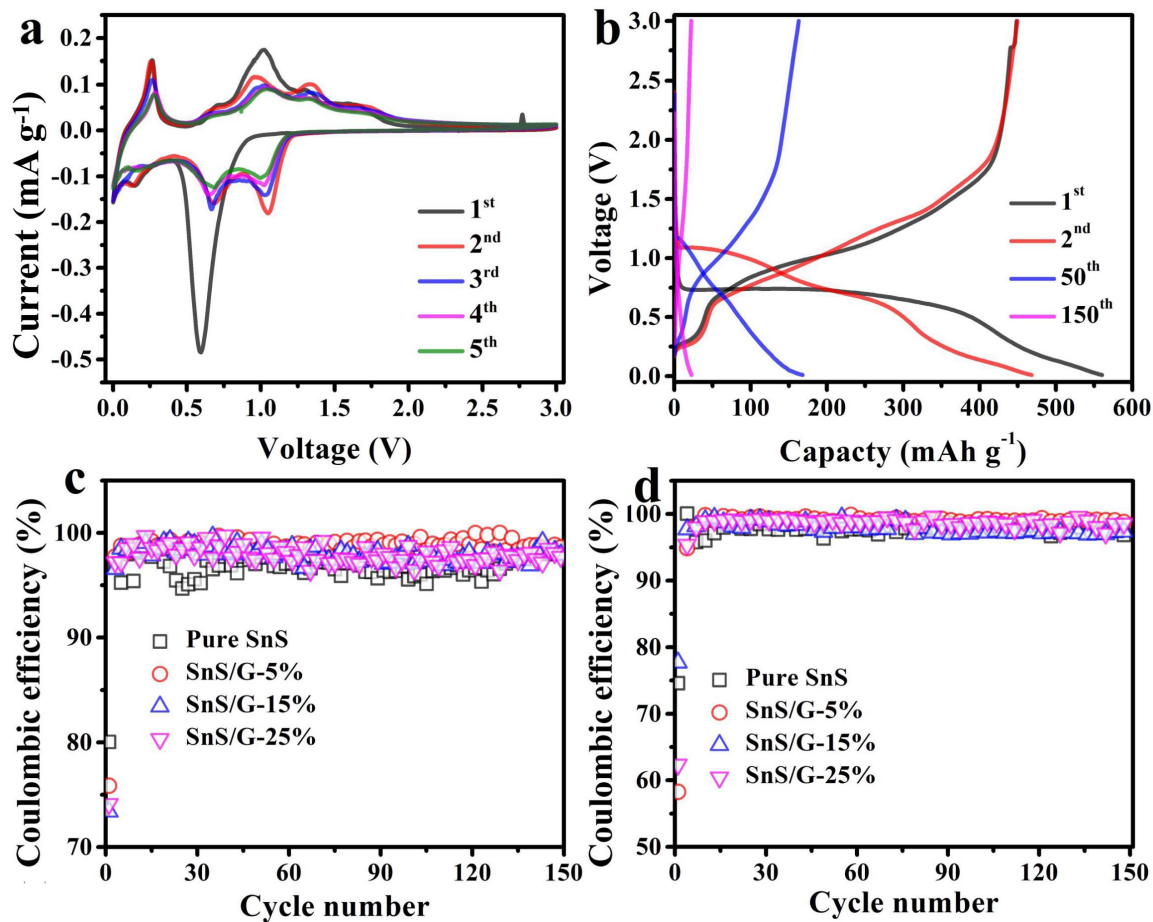

**Fig. S2** (a) CV curves of pure SnS; (b) discharge/charge curves of pure SnS under  $0.1 \text{ A g}^{-1}$ ; (c) coulombic efficiency of pure SnS, SnS/G-5%, SnS/G-15%, and SnS/G-25% under  $0.1 \text{ A g}^{-1}$ ; (d) coulombic efficiency of pure SnS, SnS/G-5%, SnS/G-15%, and SnS/G-25% under  $0.5 \text{ A g}^{-1}$ .

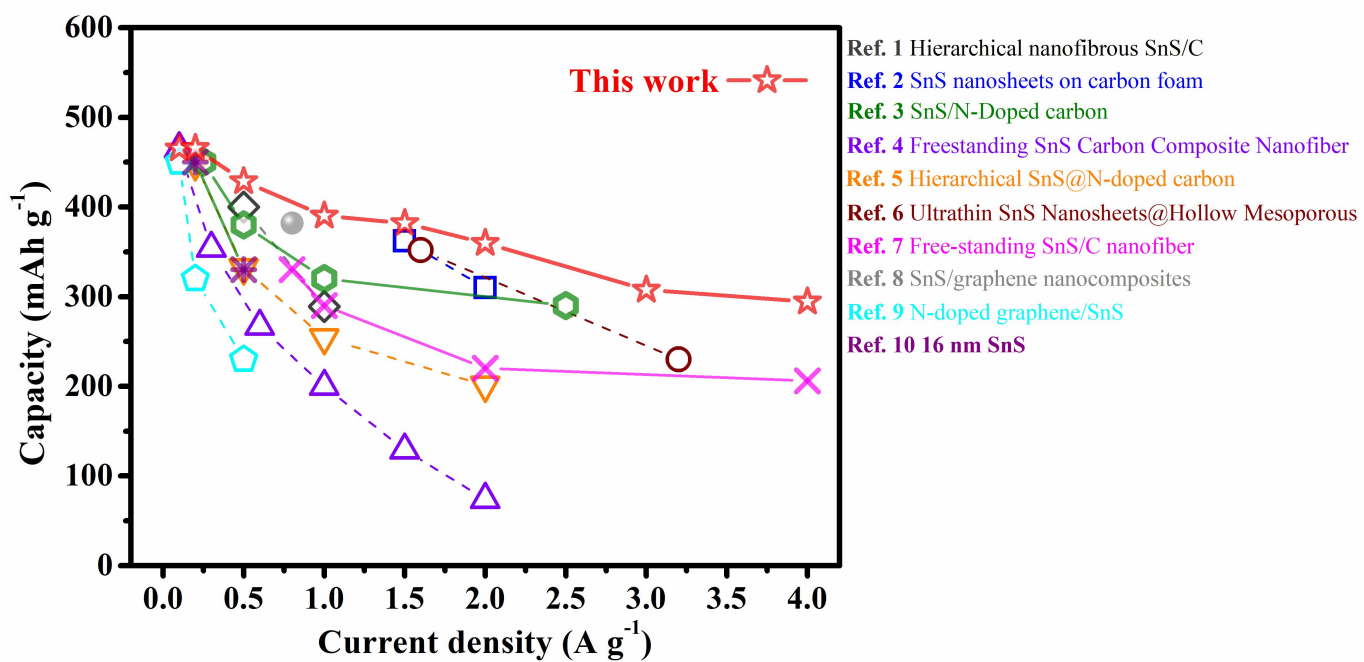

**Fig. S3** Comparison of the rate performance of SnS/G-15% with recent-reported SnS-based, SnS<sub>2</sub>-based and Sn<sub>2</sub>S<sub>3</sub>-based anode.

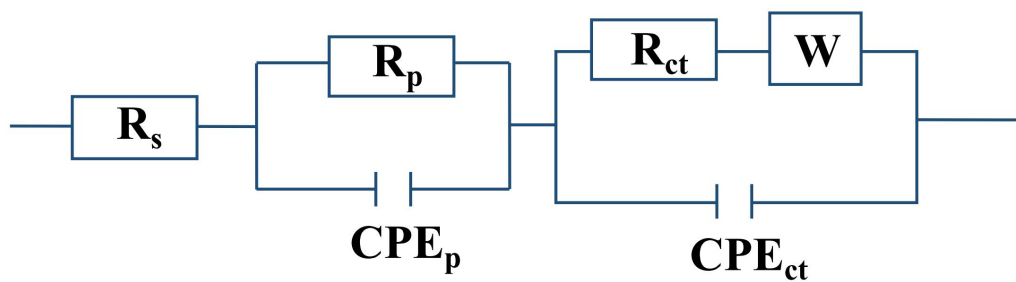

**Fig. S4** Fitted circuit diagram of EIS.

**Table S2** Element values of EIS.

| Materials | R <sub>s</sub> (Ω) | R <sub>p1</sub> (Ω) | CPE <sub>1</sub>             |       | R <sub>p2</sub> (Ω) | CPE <sub>2</sub>             |       | W<br>(mMho*s <sup>0.5</sup> ) |
|-----------|--------------------|---------------------|------------------------------|-------|---------------------|------------------------------|-------|-------------------------------|
|           |                    |                     | Y0<br>(μMho*s <sup>N</sup> ) | N     |                     | Y0<br>(μMho*s <sup>N</sup> ) | N     |                               |
| Pure SnS  | 4.88               | 20.6                | 0.667                        | 0.8   | 71                  | 1.52                         | 0.309 | 4.28                          |
| SnS/G-5%  | 5.66               | 13.7                | 0.984                        | 0.663 | 21.1                | 4.53                         | 0.555 | 104                           |
| SnS/G-15% | 3.93               | 10.8                | 1.16                         | 0.825 | 20.3                | 2.01                         | 0.577 | 82.2                          |
| SnS/G-25% | 3.87               | 10.5                | 2.18                         | 0.818 | 18.1                | 4.18                         | 0.548 | 19                            |

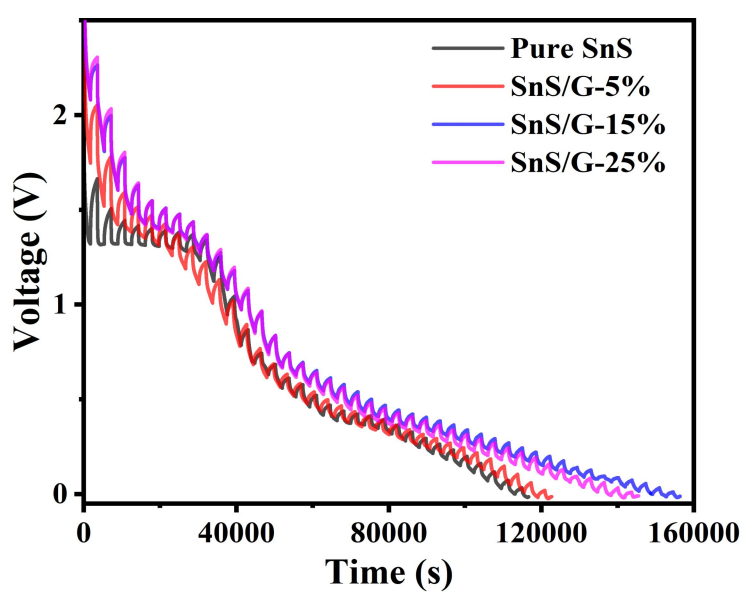**Fig. S5** GITT curves of pure SnS, SnS/G-5%, SnS/G-15%, and SnS/G-25% under 0.1 A g<sup>-1</sup>.

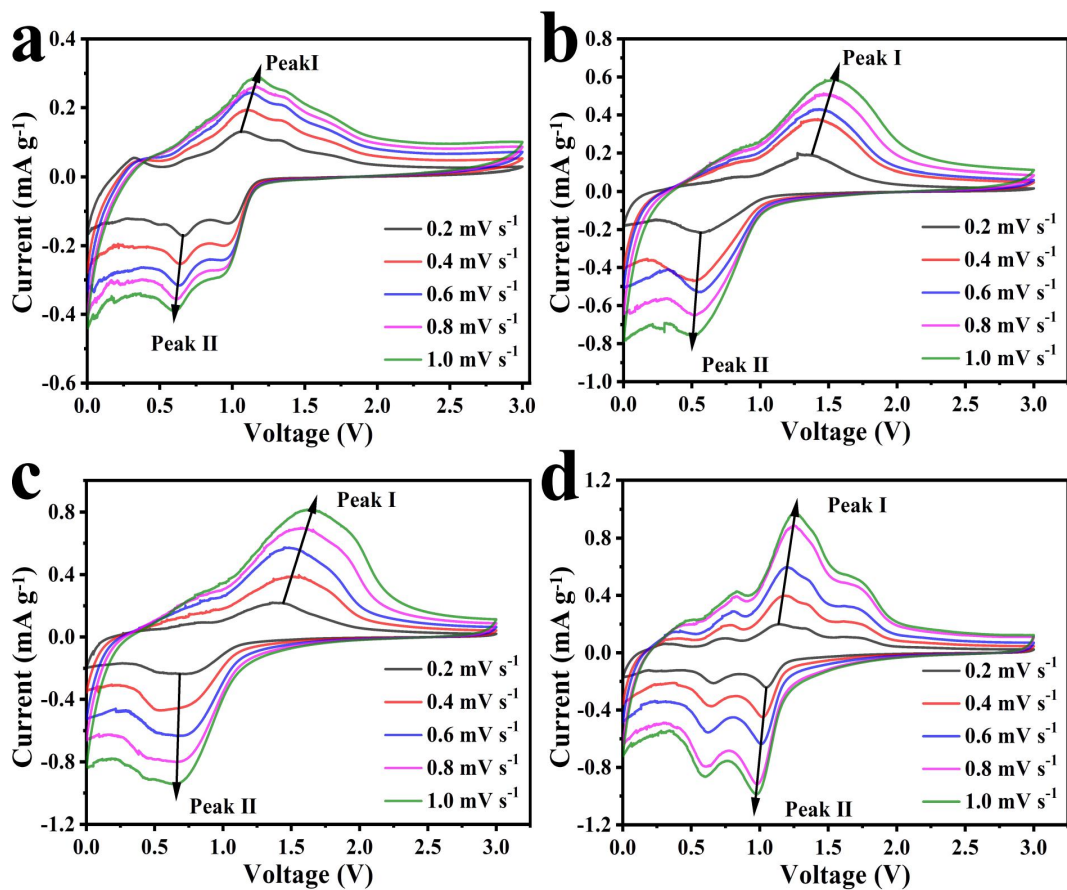

**Fig. S6** Rate CV curves of (a) pure SnS, (b) SnS/G-5%, (c) SnS/G-15%, and (d) SnS/G-25%.

## References

- [1] J. Li, M. Wang, J. Huang, Bio-inspired hierarchical nanofibrous SnS/C composite with enhanced anodic performances in lithium-ion batteries, *Journal of Alloys and Compounds*, 860 (2021) 157897.
- [2] H.-R. Yang, Y. Yang, H. Seo, K. Kim, H.S. Lee, J. Lee, J.-H. Kim, SnS nanosheets on carbon foam as a flexible anode platform for rechargeable Li- and Na-ion batteries, *Applied Surface Science*, 544 (2021) 148837.
- [3] X. Chen, E. Tervoort, H. Huang, T. Liu, M. Niederberger, SnS/N-Doped carbon composites with enhanced Li<sup>+</sup> storage and lifetime by controlled hierarchical submicron- and nano-structuring, *CrystEngComm*, 22 (2020) 1547-1554.
- [4] Y. Qi, J. Liu, J. Dai, X. Shi, X. Zhu, B. Fu, H. Dong, W. Zhao, Freestanding SnS Carbon Composite Nanofiber Material with Excellent Electrochemical Performance as Binder-Free Negative Electrode for Lithium-ion Batteries, *ChemistrySelect*, 5 (2020) 1792-1796.
- [5] J. Ren, Y. Li, C. Cao, R.-P. Ren, Y.-K. Lv, A polymer-assisted strategy for hierarchical SnS@N-doped carbon microspheres with enhanced lithium storage performance, *Ionics*, 26 (2020) 4921-4928.
- [6] S. Zhang, G. Wang, Z. Zhang, B. Wang, J. Bai, H. Wang, 3D Graphene Networks Encapsulated with Ultrathin SnS Nanosheets@Hollow Mesoporous Carbon Spheres Nanocomposite with Pseudocapacitance-Enhanced Lithium and Sodium Storage Kinetics, *Small*, 15 (2019) 1900565.
- [7] J. Xia, L. Liu, S. Jamil, J. Xie, H. Yan, Y. Yuan, Y. Zhang, S. Nie, J. Pan, X. Wang, G. Cao, Free-standing SnS/C nanofiber anodes for ultralong cycle-life lithium-ion batteries and sodium-ion batteries, *Energy Storage Materials*, 17 (2019) 1-11.
- [8] J. Zhu, X. Zhang, C. Zeng, A. Liu, G. Hu, Preparation of SnS/graphene nanocomposites from Sn/graphene for superior reversible lithium storage, *Materials Letters*, 209 (2017) 338-341.
- [9] S.-C. Zhu, H.-C. Tao, X.-L. Yang, L.-L. Zhang, S.-B. Ni, Synthesis of N-doped graphene/SnS composite and its electrochemical properties for lithium ion batteries, *Ionics*, 21 (2015) 2735-2742.

[10] S. Li, J. Zheng, Z. Hu, S. Zuo, Z. Wu, P. Yan, F. Pan, 3D-hierarchical SnS nanostructures: controlled synthesis, formation mechanism and lithium-ion storage performance, *RSC Advances*, 5 (2015) 72857-72862.
